# Supplementary material
Source: PubMed Central journal article supplement (PMC4161616)
Supplement: NIHMS593461-supplement-1.pdf [file NIHMS593461-supplement-1.pdf]

**Article Title: *C9orf72* Hypermethylation Protects Against Repeat Expansion Associated Pathology in ALS/FTD**

**Journal Name: Acta Neuropathologica**

Authors: Elaine Y. Liu<sup>1,2,4</sup>, Jenny Russ<sup>1,2,4</sup>, Kathryn Wu<sup>1,2,4</sup>, Donald Neal<sup>2,4</sup>, Eunran Suh<sup>2,4</sup>, Anna G. McNally<sup>1,2,4</sup>, David J. Irwin<sup>2,3,4</sup>, Vivianna M. Van Deerlin<sup>2,4</sup>, Edward B. Lee<sup>1,2,4</sup>

Affiliations:

1. Translational Neuropathology Research Laboratory
2. Department of Pathology and Laboratory Medicine
3. Department of Neurology
4. Perelman School of Medicine at the University of Pennsylvania, Philadelphia, PA

Corresponding Author: Edward B. Lee, M.D., Ph.D.

Corresponding E-mail: [edward.lee@uphs.upenn.edu](mailto:edward.lee@uphs.upenn.edu)

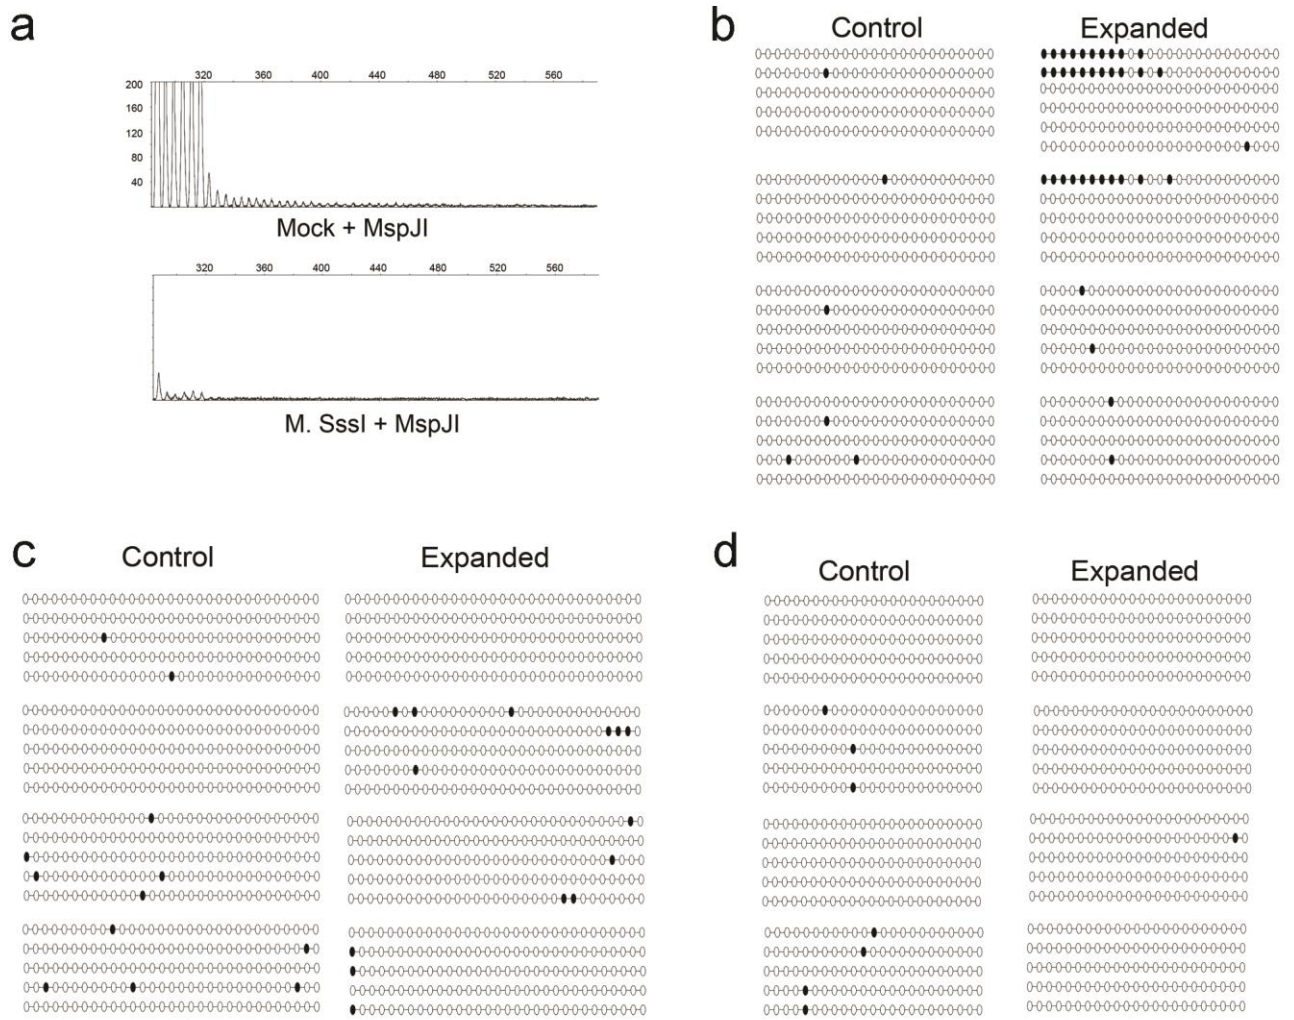

**Supplemental Figure 1: Repeat primed PCR and bisulfite cloning of *C9orf72***

(A) DNA from a repeat expanded case was in vitro methylated using MSssI methyltransferase and digested with MspJI. Digested material was subject to repeat primed PCR and representative electropherograms are shown.

(B) Bisulfite cloning results for each sequenced clone for amplicon A (panel B), amplicon B (panel C) and amplicon C (panel D) are shown. Four non-expanded controls and four expanded cases were assessed. Each oval represents a single CpG dinucleotide where unfilled ovals represent unmethylated CpG dinucleotides and filled ovals represent methylated CpG dinucleotides. Sequencing results are presented in groups of 5-6 clones which correspond to results from each case. Background non-CpG cytosines showed a conversion rate of >95%.

## Supplemental Tables

| Description                                     | Forward Oligonucleotide                                                                             | Reverse Oligonucleotide                                                                               |
|-------------------------------------------------|-----------------------------------------------------------------------------------------------------|-------------------------------------------------------------------------------------------------------|
| <i>C9orf72</i> V2 mRNA (exon 2 to 3)            | CGGTGGCGAGTGGATATCTC                                                                                | TGGGCAAAGAGTCGACATCA                                                                                  |
| <i>C9orf72</i> Total mRNA (exon 3 to 4)         | ACTGGAATGGGGATCGCAGCA                                                                               | ACCCTGATCTTCCATTCTCTCTGTGCC                                                                           |
| <i>C9orf72</i> V3 mRNA (exon 1b to 3)           | GCAAGAGCAGGTGTGGGTTT                                                                                | TGGGCAAAGAGTCGACATCA                                                                                  |
| <i>C9orf72</i> intron (intron 1)                | GCAAGAGCAGGTGTGGGTTT                                                                                | TCTTGTTCCACCTCAGCGAG                                                                                  |
| <i>C9orf72</i> SNP allele (sequencing)          | GACCAAAAGACGCAAGGTTT                                                                                | CTTTTACGTGGGCGGAACT                                                                                   |
| <i>C9orf72</i> SNP allele (PAGE)                | GACCAAAAGACGCAAGGTTT                                                                                | TTTGTGCTTGGTAGGCAGTG                                                                                  |
| <i>C9orf72</i> promoter                         | CAGTGTGAAAATCATGCTTGAGAGA                                                                           | TTTGTGCTTGGTAGGCAGTG                                                                                  |
| <i>C9orf72</i> CpG Island 1                     | GGAGTTGTTTTTTATTAGGGTTTGTAGT                                                                        | TAAACCCACACCTACTCTTACTAAA                                                                             |
| <i>C9orf72</i> CpG Island 2, first half (outer) | GTGAGTGAGGAGGYGGTATTTT                                                                              | AATCACTTCCTTTAAACAAAT                                                                                 |
| <i>C9orf72</i> CpG Island 2, first half (inner) | GTGAGTGAGGAGGYGGTATTTT                                                                              | AAACCTCTCAATACCCRAAACT                                                                                |
| <i>C9orf72</i> CpG Island 2, second half        | AGTTGTTTTTTTTTYGGGGATT                                                                              | AATCACTTCCTTTAAACAAAT                                                                                 |
| <i>C9orf72</i> Southern Blot                    | TTGCGATGACTTTGCAGGGGACC                                                                             | CAGCGAGTACTGTGAGAG                                                                                    |
| <i>GPS</i> mRNA (control)                       | AAGATGCTGGACGAGATGAAGGA                                                                             | ACGGTTGCGAATCTGGGTGTA                                                                                 |
| <i>BACT</i> mRNA (control)                      | GCCCTGAGGCACTCTTCCA                                                                                 | ATGCCACAGGACTCCATGC                                                                                   |
| GA Repeat Fragment                              | TATGGGTGCGGGAGCTGGAGCTGTGTCAGGTGCAGGTGCAGGAGCAGGTGCTGGAGCAGGAGCTGGTGCAGGTGCAGGAGCAGGAGCCGGAGCCTAAG  | AATTCTTAGGCTCCGGCTCCTGCTCCTGCACCTGCACCAGCTCCCTGCTCCAGCACCTGCTCCTGCACCTGCACCTGCACCAGCTCCAGCTCCCGCACCCA |
| GP Repeat Fragment                              | TATGGGTCCTGGACCTGGACCTGGACCAGGGCCAGGGCCGGGACCTGGACCTGGACCAGGACCTGGACCAAGGGCCAGGACCAGGACCTGGACCATAAG | AATTCTTATGGTCCAGGTCCCTGTCCCTGGCCCTGGTCCAGGTCCGGTCCAGGTCCAGGTCCCGGCCTGGCCCTGGTCCAGGTCCAGGTCCAGGACCCA   |

**Table 1: Primer Sequences**

| Diagnosis         | MND | Dementia | Gender | Age of Onset | Age of Death | Figure     | C9ORF72 Expansion |
|-------------------|-----|----------|--------|--------------|--------------|------------|-------------------|
| ALS               | Y   | N        | Female | 54           | 55           | 2, 6       | Y                 |
| ALS               | Y   | N        | Female | 55           | 59           | 1, 2, 5, 6 | Y                 |
| ALS               | Y   | N        | Female | 73           | 76           | 2, 5, 6    | Y                 |
| ALS               | Y   | N        | Female |              | 56           | 2, 6       | Y                 |
| ALS               | Y   | N        | Male   | 56           | 58           | 2, 5, 6    | Y                 |
| ALS               | Y   | N        | Male   | 56           | 58           | 1, 2, 5, 6 | Y                 |
| ALS               | Y   | N        | Male   | 62           | 64           | 1, 2, 5, 6 | Y                 |
| ALS               | Y   | N        | Male   |              | 54           | 2, 5, 6    | Y                 |
| ALS               | Y   | N        | Male   |              | 55           | 2          | Y                 |
| ALS               | Y   | N        | Male   | 51           | 56           | 1          | Y                 |
| ALS-dementia      | Y   | Y        | Female | 63           | 70           | 2          | Y                 |
| ALS-dementia      | Y   | Y        | Male   | 46           | 48           | 1, 2, 5, 6 | Y                 |
| ALS-dementia      | Y   | Y        | Male   | 52           | 54           | 1, 2, 5, 6 | Y                 |
| ALS-dementia      | Y   | Y        | Male   | 55           | 58           | 2, 5, 6    | Y                 |
| ALS-dementia      | Y   | Y        | Male   |              | 63           | 1, 2       | Y                 |
| ALS-dementia      | Y   | Y        | Male   |              | 76           | 2, 5, 6    | Y                 |
| FTD               | N   | Y        | Female | 59           | 62           | 2, 6       | Y                 |
| FTD               | N   | Y        | Female | 66           | 76           | 1, 2, 5, 6 | Y                 |
| FTD               | N   | Y        | Female |              | 72           | 2, 6       | Y                 |
| FTD               | N   | Y        | Male   | 47           | 54           | 2, 6       | Y                 |
| FTD               | N   | Y        | Male   | 63           | 76           | 1, 2, 5, 6 | Y                 |
| FTD               | N   | Y        | Male   | 63           | 67           | 1          | Y                 |
| AD                | N   | Y        | Female | 57           | 70           | 1, 2, 6    | N                 |
| AD                | N   | Y        | Male   | 72           | 79           | 2          | N                 |
| AD                | N   | Y        | Male   |              | 83           | 2          | N                 |
| ALS               | Y   | N        | Female | 50           | 53           | 1, 2, 6    | N                 |
| ALS               | Y   | N        | Female | 81           | 82           | 1, 2       | N                 |
| ALS               | Y   | N        | Male   | 76           | 77           | 1, 2       | N                 |
| DLB, AD           | N   | Y        | Female | 72           | 84           | 1, 2, 6    | N                 |
| FTD               | N   | Y        | Female | 67           | 76           | 1, 2       | N                 |
| normal            | N   | N        | Female | n/a          | 72           | 2          | N                 |
| normal            | N   | N        | Female | n/a          | 78           | 2          | N                 |
| normal            | N   | N        | Female | n/a          | 82           | 2          | N                 |
| normal            | N   | N        | Male   | n/a          | 47           | 2          | N                 |
| normal            | N   | N        | Male   | n/a          | 74           | 2          | N                 |
| normal            | N   | N        | Male   | n/a          | 76           | 2          | N                 |
| PD with MCI       | N   | Y        | Male   | 83           | 98           | 1, 2, 6    | N                 |
| vascular dementia | N   | Y        | Male   | 58           | 65           | 1, 2, 6    | N                 |

**Table 2: List of cases**

FTD= frontotemporal degeneration with TDP-43 inclusions; AD= Alzheimer's disease; MCI= mild cognitive impairment; DLB= dementia with Lewy bodies; PD= Parkinson's disease

| <b>Cell line</b> | <b>Cell Type</b> | <b>Other Type</b>                          |
|------------------|------------------|--------------------------------------------|
| A549             | Epithelial       |                                            |
| HAOEC            | Epithelial       |                                            |
| HELAS3           | Epithelial       |                                            |
| HEPG2            | Epithelial       |                                            |
| HMEPC            | Epithelial       |                                            |
| HPIEPC           | Epithelial       |                                            |
| HSAVEC           | Epithelial       |                                            |
| HUVEC            | Epithelial       |                                            |
| MCF7             | Epithelial       |                                            |
| NHEK             | Epithelial       |                                            |
| AG04450          | Fibroblastic     |                                            |
| BJ               | Fibroblastic     |                                            |
| HAOAF            | Fibroblastic     |                                            |
| HVMF             | Fibroblastic     |                                            |
| IMR90            | Fibroblastic     |                                            |
| NHDF             | Fibroblastic     |                                            |
| CD20             | Hematopoietic    |                                            |
| CD34 mobilized   | Hematopoietic    |                                            |
| GM12878          | Hematopoietic    |                                            |
| K562             | Hematopoietic    |                                            |
| MONOCD14         | Hematopoietic    |                                            |
| SKNSH            | Neuronal         |                                            |
| SKNSH RA treated | Neuronal         |                                            |
| H1HESC           | Other            | Embryonic stem cell                        |
| HCH              | Other            | Chondrocytes                               |
| HFDPC            | Other            | Hair follicle dermal papilla cells         |
| HMSCAT           | Other            | Mesenchymal stem cell from adipose         |
| HMSCBM           | Other            | Mesenchymal stem cell from bone marrow     |
| HMSCUC           | Other            | Mesenchymal stem cells from umbilical cord |
| HOB              | Other            | Osteoblasts                                |
| HPCPL            | Other            | Pericytes                                  |
| HWP              | Other            | White preadipocytes                        |
| NHEMFM2          | Other            | Melanocytes                                |
| NHEMM2           | Other            | Melanocytes                                |
| SKMC             | Other            | Striated muscle                            |

**Table 3: ENCODE CAGE-seq Cell Lines**
